# Supplementary material for: Associations of the APOE ε2 and ε4 alleles and polygenic profiles comprising APOE-TOMM40-APOC1 variants with Alzheimer’s disease biomarkers
Source: publisher site journal article supplement (doi:10.18632/aging.204384), 2022-11-17
Supplement: Supplementary file [file aging-v14i24-204384-supplementary-material-SD2.pdf]

## SUPPLEMENTARY TABLES

**Supplementary Table 1. Basic characteristics of the genotyped participants of European ancestry in the selected studies over all available longitudinal measurements.**

| Study     | Source | <i>N</i> | Men (%)     | Age (SD, SE), years | A $\beta$ 40 (SD, SE), pg/ml | A $\beta$ 42 (SD, SE), pg/ml | Tau (SD, SE), pg/ml | pTau (SD, SE), pg/ml |
|-----------|--------|----------|-------------|---------------------|------------------------------|------------------------------|---------------------|----------------------|
| ADNI-1    | Plasma | 2077     | 1269 (61.1) | 76.6 (6.6, 0.1)     | 164.4 (46.7, 1.0)            | 39.9 (10.9, 0.2)             | NA                  | NA                   |
| ADNI-1    | CSF    | 948      | 571 (60.2)  | 76.7 (6.9, 0.2)     | 7844.7 (2326.7, 97.1)        | 768.6 (365.6, 11.9)          | 307.6 (122.3, 4.0)  | 29.7 (13.7, 0.4)     |
| ADNI-2/GO | CSF    | 636      | 357 (56.1)  | 73.9 (7.4, 0.3)     | 8652.0 (2492.9, 105.0)       | 901.4 (369.0, 14.6)          | 279.6 (121.9, 4.8)  | 26.3 (13.3, 0.5)     |

Abbreviation: CSF: cerebrospinal fluid; SD: standard deviation; SE: standard error. *N* denotes the total number of observations of Alzheimer's disease (AD) biomarkers at four (plasma) and up to eight (CSF) examinations. ADNI-1 and ADNI-2/GO denote the AD Neuroimaging Initiative initial and extended cohorts, respectively. Age was defined at the time of the AD biomarker measurement.

**Supplementary Table 2. Pearson pair-wise correlation estimates between Alzheimer's disease (AD) biomarkers in selected studies.**

| Study     | Biomarker_1         | Biomarker_2         | <i>N</i> | Correlation, <i>r</i> | <i>P</i> value |
|-----------|---------------------|---------------------|----------|-----------------------|----------------|
| ADNI-1    | A $\beta$ 40_plasma | A $\beta$ 42_plasma | 608      | 0.703                 | 6.80E-92       |
| ADNI-1    | A $\beta$ 40_plasma | Tau_plasma          | 449      | 0.127                 | 7.03E-03       |
| ADNI-1    | A $\beta$ 42_plasma | Tau_plasma          | 450      | 0.064                 | 1.73E-01       |
| ADNI-1    | A $\beta$ 40_CSF    | A $\beta$ 42_CSF    | 305      | 0.304                 | 6.41E-08       |
| ADNI-1    | A $\beta$ 40_CSF    | Tau_CSF             | 339      | 0.524                 | 2.85E-25       |
| ADNI-1    | A $\beta$ 40_CSF    | pTau_CSF            | 339      | 0.460                 | 4.01E-19       |
| ADNI-1    | A $\beta$ 42_CSF    | Tau_CSF             | 308      | -0.275                | 9.27E-07       |
| ADNI-1    | A $\beta$ 42_CSF    | pTau_CSF            | 308      | -0.314                | 1.78E-08       |
| ADNI-1    | Tau_CSF             | pTau_CSF            | 345      | 0.980                 | 9.17E-244      |
| ADNI-1    | A $\beta$ 42_plasma | A $\beta$ 42_CSF    | 280      | 0.074                 | 2.19E-01       |
| ADNI-1    | A $\beta$ 40_plasma | A $\beta$ 40_CSF    | 313      | 0.005                 | 9.24E-01       |
| ADNI-1    | Tau_CSF             | Tau_plasma          | 334      | 0.155                 | 4.51E-03       |
| ADNI-2/GO | A $\beta$ 40_CSF    | A $\beta$ 42_CSF    | 274      | 0.253                 | 2.22E-05       |
| ADNI-2/GO | A $\beta$ 40_CSF    | Tau_CSF             | 351      | 0.542                 | 3.78E-28       |
| ADNI-2/GO | A $\beta$ 40_CSF    | pTau_CSF            | 351      | 0.464                 | 4.13E-20       |
| ADNI-2/GO | A $\beta$ 42_CSF    | Tau_CSF             | 283      | -0.269                | 4.39E-06       |
| ADNI-2/GO | A $\beta$ 42_CSF    | pTau_CSF            | 283      | -0.326                | 2.04E-08       |
| ADNI-2/GO | Tau_CSF             | pTau_CSF            | 360      | 0.979                 | 3.03E-250      |
| FHS_C1    | A $\beta$ 40_plasma | A $\beta$ 42_plasma | 636      | 0.613                 | 7.16E-67       |
| FHS_C1    | A $\beta$ 40_plasma | Tau_plasma          | 128      | 0.103                 | 2.49E-01       |
| FHS_C1    | A $\beta$ 42_plasma | Tau_plasma          | 128      | 0.096                 | 2.80E-01       |
| FHS_C2    | A $\beta$ 40_plasma | A $\beta$ 42_plasma | 3095     | 0.500                 | 9.43E-196      |
| FHS_C2    | A $\beta$ 40_plasma | Tau_plasma          | 2554     | 0.108                 | 5.04E-08       |
| FHS_C2    | A $\beta$ 42_plasma | Tau_plasma          | 2554     | 0.068                 | 5.77E-04       |
| FHS_C3    | A $\beta$ 40_plasma | A $\beta$ 42_plasma | 3029     | 0.388                 | 1.40E-109      |
| FHS_C3    | A $\beta$ 40_plasma | Tau_plasma          | 3026     | 0.021                 | 2.45E-01       |
| FHS_C3    | A $\beta$ 42_plasma | Tau_plasma          | 3026     | 0.043                 | 1.91E-02       |

*N* denotes the number of subjects. Abbreviation: CSF: cerebrospinal fluid. FHS\_C1, FHS\_C2, and FHS\_C3 denote the Framingham Heart Study parental, offspring, and grandchildren cohorts, respectively; ADNI-1 and ADNI-2/GO denote the AD Neuroimaging Initiative initial and extended cohorts, respectively.

**Supplementary Table 3. Associations of the APOE  $\epsilon$ 4 allele with Alzheimer's disease (AD) biomarkers.**

| Study       | Type         | Biomarker    | Source | Genotype | <i>N</i> subjects | <i>N</i> observations | Beta      | SE    | <i>P</i> value |
|-------------|--------------|--------------|--------|----------|-------------------|-----------------------|-----------|-------|----------------|
| ADNI-1      | Baseline     | A $\beta$ 40 | CSF    | e4       | 171               | 171                   | -0.047    | 0.034 | 1.76E-01       |
| ADNI-1      | Baseline     | A $\beta$ 40 | CSF    | e33      | 149               | 149                   | Reference |       |                |
| ADNI-2/GO   | Baseline     | A $\beta$ 40 | CSF    | e4       | 133               | 133                   | 0.022     | 0.033 | 5.06E-01       |
| ADNI-2/GO   | Baseline     | A $\beta$ 40 | CSF    | e33      | 185               | 185                   | Reference |       |                |
| <b>Meta</b> | Baseline     | A $\beta$ 40 | CSF    | e4       | 304               | 304                   | -0.011    | 0.024 | 6.49E-01       |
| <b>Meta</b> | Baseline     | A $\beta$ 40 | CSF    | e33      | 334               | 334                   | Reference |       |                |
| ADNI-1      | Longitudinal | A $\beta$ 40 | CSF    | e4       | 173               | 271                   | -0.051    | 0.049 | 2.97E-01       |
| ADNI-1      | Longitudinal | A $\beta$ 40 | CSF    | e33      | 152               | 267                   | Reference |       |                |
| ADNI-2/GO   | Longitudinal | A $\beta$ 40 | CSF    | e4       | 134               | 216                   | 0.034     | 0.045 | 4.58E-01       |
| ADNI-2/GO   | Longitudinal | A $\beta$ 40 | CSF    | e33      | 186               | 290                   | Reference |       |                |
| <b>Meta</b> | Longitudinal | A $\beta$ 40 | CSF    | e4       | 307               | 487                   | -0.005    | 0.033 | 8.70E-01       |
| <b>Meta</b> | Longitudinal | A $\beta$ 40 | CSF    | e33      | 338               | 557                   | Reference |       |                |
| ADNI-1      | Baseline     | A $\beta$ 40 | Plasma | e4       | 291               | 291                   | -0.795    | 4.345 | 8.55E-01       |
| ADNI-1      | Baseline     | A $\beta$ 40 | Plasma | e33      | 270               | 270                   | Reference |       |                |
| FHS_C1      | Baseline     | A $\beta$ 40 | Plasma | e4       | 114               | 114                   | -8.986    | 4.397 | 4.15E-02       |
| FHS_C1      | Baseline     | A $\beta$ 40 | Plasma | e33      | 432               | 432                   | Reference |       |                |
| FHS_C2      | Baseline     | A $\beta$ 40 | Plasma | e4       | 630               | 630                   | 0.666     | 1.827 | 7.16E-01       |
| FHS_C2      | Baseline     | A $\beta$ 40 | Plasma | e33      | 1982              | 1982                  | Reference |       |                |
| FHS_C3      | Baseline     | A $\beta$ 40 | Plasma | e4       | 674               | 674                   | -2.299    | 2.609 | 3.78E-01       |
| FHS_C3      | Baseline     | A $\beta$ 40 | Plasma | e33      | 1916              | 1916                  | Reference |       |                |
| ARIC        | Baseline     | A $\beta$ 40 | Plasma | e4       | 400               | 400                   | -2.837    | 4.938 | 5.66E-01       |
| ARIC        | Baseline     | A $\beta$ 40 | Plasma | e33      | 1083              | 1083                  | Reference |       |                |
| <b>Meta</b> | Baseline     | A $\beta$ 40 | Plasma | e4       | 2109              | 2109                  | -1.287    | 1.300 | 3.22E-01       |
| <b>Meta</b> | Baseline     | A $\beta$ 40 | Plasma | e33      | 5683              | 5683                  | Reference |       |                |
| ADNI-1      | Longitudinal | A $\beta$ 40 | Plasma | e4       | 296               | 961                   | -1.237    | 3.270 | 7.05E-01       |
| ADNI-1      | Longitudinal | A $\beta$ 40 | Plasma | e33      | 277               | 942                   | Reference |       |                |
| <b>Meta</b> | Longitudinal | A $\beta$ 40 | Plasma | e4       | 296               | 961                   | -1.237    | 3.270 | 7.05E-01       |
| <b>Meta</b> | Longitudinal | A $\beta$ 40 | Plasma | e33      | 277               | 942                   | Reference |       |                |
| ADNI-1      | Baseline     | A $\beta$ 42 | CSF    | e4       | 165               | 165                   | -0.407    | 0.048 | 7.15E-16       |
| ADNI-1      | Baseline     | A $\beta$ 42 | CSF    | e33      | 125               | 125                   | Reference |       |                |
| ADNI-2/GO   | Baseline     | A $\beta$ 42 | CSF    | e4       | 127               | 127                   | -0.256    | 0.049 | 3.94E-07       |
| ADNI-2/GO   | Baseline     | A $\beta$ 42 | CSF    | e33      | 134               | 134                   | Reference |       |                |
| <b>Meta</b> | Baseline     | A $\beta$ 42 | CSF    | e4       | 292               | 292                   | -0.334    | 0.034 | 1.50E-22       |
| <b>Meta</b> | Baseline     | A $\beta$ 42 | CSF    | e33      | 259               | 259                   | Reference |       |                |
| ADNI-1      | Longitudinal | A $\beta$ 42 | CSF    | e4       | 178               | 433                   | -0.478    | 0.062 | 4.85E-14       |
| ADNI-1      | Longitudinal | A $\beta$ 42 | CSF    | e33      | 151               | 374                   | Reference |       |                |
| ADNI-2/GO   | Longitudinal | A $\beta$ 42 | CSF    | e4       | 132               | 223                   | -0.274    | 0.069 | 9.49E-05       |
| ADNI-2/GO   | Longitudinal | A $\beta$ 42 | CSF    | e33      | 142               | 231                   | Reference |       |                |
| <b>Meta</b> | Longitudinal | A $\beta$ 42 | CSF    | e4       | 310               | 656                   | -0.387    | 0.046 | 7.32E-17       |
| <b>Meta</b> | Longitudinal | A $\beta$ 42 | CSF    | e33      | 293               | 605                   | Reference |       |                |
| ADNI-1      | Baseline     | A $\beta$ 42 | Plasma | e4       | 291               | 291                   | -1.987    | 0.944 | 3.57E-02       |
| ADNI-1      | Baseline     | A $\beta$ 42 | Plasma | e33      | 273               | 273                   | Reference |       |                |
| FHS_C1      | Baseline     | A $\beta$ 42 | Plasma | e4       | 114               | 114                   | -3.912    | 1.194 | 1.12E-03       |

|             |              |      |        |     |      |      |           |       |          |
|-------------|--------------|------|--------|-----|------|------|-----------|-------|----------|
| FHS_C1      | Baseline     | Aβ42 | Plasma | e33 | 432  | 432  | Reference |       |          |
| FHS_C2      | Baseline     | Aβ42 | Plasma | e4  | 630  | 630  | -1.891    | 0.466 | 5.04E-05 |
| FHS_C2      | Baseline     | Aβ42 | Plasma | e33 | 1982 | 1982 | Reference |       |          |
| FHS_C3      | Baseline     | Aβ42 | Plasma | e4  | 674  | 674  | -1.019    | 0.454 | 2.50E-02 |
| FHS_C3      | Baseline     | Aβ42 | Plasma | e33 | 1916 | 1916 | Reference |       |          |
| ARIC        | Baseline     | Aβ42 | Plasma | e4  | 397  | 397  | -3.114    | 0.654 | 2.10E-06 |
| ARIC        | Baseline     | Aβ42 | Plasma | e33 | 1076 | 1076 | Reference |       |          |
| <b>Meta</b> | Baseline     | Aβ42 | Plasma | e4  | 2106 | 2106 | -1.903    | 0.271 | 2.18E-12 |
| <b>Meta</b> | Baseline     | Aβ42 | Plasma | e33 | 5679 | 5679 | Reference |       |          |
| ADNI-1      | Longitudinal | Aβ42 | Plasma | e4  | 296  | 962  | -1.995    | 0.799 | 1.26E-02 |
| ADNI-1      | Longitudinal | Aβ42 | Plasma | e33 | 277  | 950  | Reference |       |          |
| <b>Meta</b> | Longitudinal | Aβ42 | Plasma | e4  | 296  | 962  | -1.995    | 0.799 | 1.26E-02 |
| <b>Meta</b> | Longitudinal | Aβ42 | Plasma | e33 | 277  | 950  | Reference |       |          |
| ADNI-1      | Baseline     | Tau  | CSF    | e4  | 167  | 167  | 0.204     | 0.043 | 3.04E-06 |
| ADNI-1      | Baseline     | Tau  | CSF    | e33 | 149  | 149  | Reference |       |          |
| ADNI-2/GO   | Baseline     | Tau  | CSF    | e4  | 135  | 135  | 0.323     | 0.045 | 6.80E-12 |
| ADNI-2/GO   | Baseline     | Tau  | CSF    | e33 | 192  | 192  | Reference |       |          |
| <b>Meta</b> | Baseline     | Tau  | CSF    | e4  | 302  | 302  | 0.261     | 0.031 | 6.58E-17 |
| <b>Meta</b> | Baseline     | Tau  | CSF    | e33 | 341  | 341  | Reference |       |          |
| ADNI-1      | Longitudinal | Tau  | CSF    | e4  | 179  | 435  | 0.217     | 0.059 | 2.36E-04 |
| ADNI-1      | Longitudinal | Tau  | CSF    | e33 | 165  | 433  | Reference |       |          |
| ADNI-2/GO   | Longitudinal | Tau  | CSF    | e4  | 138  | 237  | 0.304     | 0.059 | 3.13E-07 |
| ADNI-2/GO   | Longitudinal | Tau  | CSF    | e33 | 194  | 334  | Reference |       |          |
| <b>Meta</b> | Longitudinal | Tau  | CSF    | e4  | 317  | 672  | 0.260     | 0.042 | 3.59E-10 |
| <b>Meta</b> | Longitudinal | Tau  | CSF    | e33 | 359  | 767  | Reference |       |          |
| ADNI-1      | Baseline     | Tau  | Plasma | e4  | 235  | 235  | 0.102     | 0.053 | 5.75E-02 |
| ADNI-1      | Baseline     | Tau  | Plasma | e33 | 223  | 223  | Reference |       |          |
| FHS_C1      | Baseline     | Tau  | Plasma | e4  | 20   | 20   | -0.113    | 0.082 | 1.72E-01 |
| FHS_C1      | Baseline     | Tau  | Plasma | e33 | 93   | 93   | Reference |       |          |
| FHS_C2      | Baseline     | Tau  | Plasma | e4  | 556  | 556  | 0.019     | 0.019 | 3.25E-01 |
| FHS_C2      | Baseline     | Tau  | Plasma | e33 | 1721 | 1721 | Reference |       |          |
| FHS_C3      | Baseline     | Tau  | Plasma | e4  | 673  | 673  | -0.003    | 0.013 | 8.31E-01 |
| FHS_C3      | Baseline     | Tau  | Plasma | e33 | 1914 | 1914 | Reference |       |          |
| <b>Meta</b> | Baseline     | Tau  | Plasma | e4  | 1484 | 1484 | 0.006     | 0.011 | 5.67E-01 |
| <b>Meta</b> | Baseline     | Tau  | Plasma | e33 | 3951 | 3951 | Reference |       |          |

ARIC is the Atherosclerosis Risk in Communities Study. FHS\_C1, FHS\_C2, and FHS\_C3 denote the Framingham Heart Study parental, offspring, and grandchildren cohorts, respectively. ADNI-1 and ADNI-2/GO denote the Alzheimer's disease Neuroimaging Initiative initial and extended cohorts, respectively. Meta shows the results of meta-analysis. Meta-analysis field was shown for consistency for each biomarker even if the analysis was performed in one study only. Column "Type" indicates biomarker measurements at baseline or longitudinally. Abbreviations: CSF: cerebrospinal fluid; SE: standard error. The APOE ε4 allele was defined as e34 and e44 genotypes. A gamma general linear model with a log link function was used for all biomarkers except Aβ40 and Aβ42 measured in plasma.

**Supplementary Table 4. Associations of the APOE  $\epsilon$ 2 allele with Alzheimer’s disease (AD) biomarkers.**

| Study       | Type         | Biomarker    | Source | Genotype | N subjects | N observations | Beta      | SE    | P value  |
|-------------|--------------|--------------|--------|----------|------------|----------------|-----------|-------|----------|
| ADNI-1      | Baseline     | A $\beta$ 40 | CSF    | e4       | 25         | 25             | 0.063     | 0.069 | 3.62E-01 |
| ADNI-1      | Baseline     | A $\beta$ 40 | CSF    | e33      | 149        | 149            | Reference |       |          |
| ADNI-2/GO   | Baseline     | A $\beta$ 40 | CSF    | e4       | 31         | 31             | -0.032    | 0.055 | 5.68E-01 |
| ADNI-2/GO   | Baseline     | A $\beta$ 40 | CSF    | e33      | 185        | 185            | Reference |       |          |
| <i>Meta</i> | Baseline     | A $\beta$ 40 | CSF    | e4       | 56         | 56             | 0.006     | 0.043 | 8.99E-01 |
| <i>Meta</i> | Baseline     | A $\beta$ 40 | CSF    | e33      | 334        | 334            | Reference |       |          |
| ADNI-1      | Longitudinal | A $\beta$ 40 | CSF    | e4       | 25         | 27             | 0.075     | 0.093 | 4.21E-01 |
| ADNI-1      | Longitudinal | A $\beta$ 40 | CSF    | e33      | 152        | 267            | Reference |       |          |
| ADNI-2/GO   | Longitudinal | A $\beta$ 40 | CSF    | e4       | 31         | 54             | -0.058    | 0.080 | 4.67E-01 |
| ADNI-2/GO   | Longitudinal | A $\beta$ 40 | CSF    | e33      | 186        | 290            | Reference |       |          |
| <i>Meta</i> | Longitudinal | A $\beta$ 40 | CSF    | e4       | 56         | 81             | -0.002    | 0.060 | 9.80E-01 |
| <i>Meta</i> | Longitudinal | A $\beta$ 40 | CSF    | e33      | 338        | 557            | Reference |       |          |
| ADNI-1      | Baseline     | A $\beta$ 40 | Plasma | e4       | 36         | 36             | 0.679     | 8.602 | 9.37E-01 |
| ADNI-1      | Baseline     | A $\beta$ 40 | Plasma | e33      | 270        | 270            | Reference |       |          |
| FHS_C1      | Baseline     | A $\beta$ 40 | Plasma | e4       | 74         | 74             | -1.922    | 5.561 | 7.30E-01 |
| FHS_C1      | Baseline     | A $\beta$ 40 | Plasma | e33      | 432        | 432            | Reference |       |          |
| FHS_C2      | Baseline     | A $\beta$ 40 | Plasma | e4       | 402        | 402            | 1.457     | 2.213 | 5.10E-01 |
| FHS_C2      | Baseline     | A $\beta$ 40 | Plasma | e33      | 1982       | 1982           | Reference |       |          |
| FHS_C3      | Baseline     | A $\beta$ 40 | Plasma | e4       | 370        | 370            | -6.513    | 3.022 | 3.12E-02 |
| FHS_C3      | Baseline     | A $\beta$ 40 | Plasma | e33      | 1916       | 1916           | Reference |       |          |
| ARIC        | Baseline     | A $\beta$ 40 | Plasma | e4       | 230        | 230            | -12.561   | 6.078 | 3.90E-02 |
| ARIC        | Baseline     | A $\beta$ 40 | Plasma | e33      | 1083       | 1083           | Reference |       |          |
| <i>Meta</i> | Baseline     | A $\beta$ 40 | Plasma | e4       | 1112       | 1112           | -2.091    | 1.608 | 1.93E-01 |
| <i>Meta</i> | Baseline     | A $\beta$ 40 | Plasma | e33      | 5683       | 5683           | Reference |       |          |
| ADNI-1      | Longitudinal | A $\beta$ 40 | Plasma | e4       | 36         | 123            | -3.345    | 6.555 | 6.10E-01 |
| ADNI-1      | Longitudinal | A $\beta$ 40 | Plasma | e33      | 277        | 942            | Reference |       |          |
| <i>Meta</i> | Longitudinal | A $\beta$ 40 | Plasma | e4       | 36         | 123            | -3.345    | 6.555 | 6.10E-01 |
| <i>Meta</i> | Longitudinal | A $\beta$ 40 | Plasma | e33      | 277        | 942            | Reference |       |          |
| ADNI-1      | Baseline     | A $\beta$ 42 | CSF    | e4       | 17         | 17             | 0.162     | 0.106 | 1.27E-01 |
| ADNI-1      | Baseline     | A $\beta$ 42 | CSF    | e33      | 125        | 125            | Reference |       |          |
| ADNI-2/GO   | Baseline     | A $\beta$ 42 | CSF    | e4       | 20         | 20             | 0.130     | 0.086 | 1.31E-01 |
| ADNI-2/GO   | Baseline     | A $\beta$ 42 | CSF    | e33      | 134        | 134            | Reference |       |          |
| <i>Meta</i> | Baseline     | A $\beta$ 42 | CSF    | e4       | 37         | 37             | 0.143     | 0.067 | 3.18E-02 |
| <i>Meta</i> | Baseline     | A $\beta$ 42 | CSF    | e33      | 259        | 259            | Reference |       |          |
| ADNI-1      | Longitudinal | A $\beta$ 42 | CSF    | e4       | 19         | 42             | 0.142     | 0.150 | 3.42E-01 |
| ADNI-1      | Longitudinal | A $\beta$ 42 | CSF    | e33      | 151        | 374            | Reference |       |          |
| ADNI-2/GO   | Longitudinal | A $\beta$ 42 | CSF    | e4       | 20         | 38             | 0.084     | 0.144 | 5.61E-01 |
| ADNI-2/GO   | Longitudinal | A $\beta$ 42 | CSF    | e33      | 142        | 231            | Reference |       |          |
| <i>Meta</i> | Longitudinal | A $\beta$ 42 | CSF    | e4       | 39         | 80             | 0.112     | 0.104 | 2.80E-01 |
| <i>Meta</i> | Longitudinal | A $\beta$ 42 | CSF    | e33      | 293        | 605            | Reference |       |          |
| ADNI-1      | Baseline     | A $\beta$ 42 | Plasma | e4       | 36         | 36             | 0.278     | 2.062 | 8.93E-01 |
| ADNI-1      | Baseline     | A $\beta$ 42 | Plasma | e33      | 273        | 273            | Reference |       |          |
| FHS_C1      | Baseline     | A $\beta$ 42 | Plasma | e4       | 74         | 74             | -1.185    | 1.499 | 4.30E-01 |

|             |              |      |        |     |      |      |           |       |          |
|-------------|--------------|------|--------|-----|------|------|-----------|-------|----------|
| FHS_C1      | Baseline     | Aβ42 | Plasma | e33 | 432  | 432  | Reference |       |          |
| FHS_C2      | Baseline     | Aβ42 | Plasma | e4  | 402  | 402  | 0.228     | 0.567 | 6.88E-01 |
| FHS_C2      | Baseline     | Aβ42 | Plasma | e33 | 1982 | 1982 | Reference |       |          |
| FHS_C3      | Baseline     | Aβ42 | Plasma | e4  | 370  | 370  | -0.268    | 0.565 | 6.36E-01 |
| FHS_C3      | Baseline     | Aβ42 | Plasma | e33 | 1916 | 1916 | Reference |       |          |
| ARIC        | Baseline     | Aβ42 | Plasma | e4  | 228  | 228  | -0.198    | 0.830 | 8.12E-01 |
| ARIC        | Baseline     | Aβ42 | Plasma | e33 | 1076 | 1076 | Reference |       |          |
| <b>Meta</b> | Baseline     | Aβ42 | Plasma | e4  | 1110 | 1110 | -0.105    | 0.346 | 7.61E-01 |
| <b>Meta</b> | Baseline     | Aβ42 | Plasma | e33 | 5679 | 5679 | Reference |       |          |
| ADNI-1      | Longitudinal | Aβ42 | Plasma | e4  | 36   | 123  | -0.982    | 1.751 | 5.75E-01 |
| ADNI-1      | Longitudinal | Aβ42 | Plasma | e33 | 277  | 950  | Reference |       |          |
| <b>Meta</b> | Longitudinal | Aβ42 | Plasma | e4  | 36   | 123  | -0.982    | 1.751 | 5.75E-01 |
| <b>Meta</b> | Longitudinal | Aβ42 | Plasma | e33 | 277  | 950  | Reference |       |          |
| ADNI-1      | Baseline     | Tau  | CSF    | e4  | 24   | 24   | -0.003    | 0.093 | 9.71E-01 |
| ADNI-1      | Baseline     | Tau  | CSF    | e33 | 149  | 149  | Reference |       |          |
| ADNI-2/GO   | Baseline     | Tau  | CSF    | e4  | 31   | 31   | -0.111    | 0.071 | 1.17E-01 |
| ADNI-2/GO   | Baseline     | Tau  | CSF    | e33 | 192  | 192  | Reference |       |          |
| <b>Meta</b> | Baseline     | Tau  | CSF    | e4  | 55   | 55   | -0.072    | 0.056 | 2.02E-01 |
| <b>Meta</b> | Baseline     | Tau  | CSF    | e33 | 341  | 341  | Reference |       |          |
| ADNI-1      | Longitudinal | Tau  | CSF    | e4  | 25   | 59   | 0.013     | 0.120 | 9.11E-01 |
| ADNI-1      | Longitudinal | Tau  | CSF    | e33 | 165  | 433  | Reference |       |          |
| ADNI-2/GO   | Longitudinal | Tau  | CSF    | e4  | 31   | 61   | -0.106    | 0.101 | 2.93E-01 |
| ADNI-2/GO   | Longitudinal | Tau  | CSF    | e33 | 194  | 334  | Reference |       |          |
| <b>Meta</b> | Longitudinal | Tau  | CSF    | e4  | 56   | 120  | -0.057    | 0.077 | 4.64E-01 |
| <b>Meta</b> | Longitudinal | Tau  | CSF    | e33 | 359  | 767  | Reference |       |          |
| ADNI-1      | Baseline     | Tau  | Plasma | e4  | 32   | 32   | -0.127    | 0.111 | 2.52E-01 |
| ADNI-1      | Baseline     | Tau  | Plasma | e33 | 223  | 223  | Reference |       |          |
| FHS_C1      | Baseline     | Tau  | Plasma | e4  | 21   | 21   | -0.127    | 0.055 | 2.12E-02 |
| FHS_C1      | Baseline     | Tau  | Plasma | e33 | 93   | 93   | Reference |       |          |
| FHS_C2      | Baseline     | Tau  | Plasma | e4  | 350  | 350  | 0.011     | 0.020 | 5.77E-01 |
| FHS_C2      | Baseline     | Tau  | Plasma | e33 | 1721 | 1721 | Reference |       |          |
| FHS_C3      | Baseline     | Tau  | Plasma | e4  | 370  | 370  | 0.037     | 0.019 | 4.80E-02 |
| FHS_C3      | Baseline     | Tau  | Plasma | e33 | 1914 | 1914 | Reference |       |          |
| <b>Meta</b> | Baseline     | Tau  | Plasma | e4  | 773  | 773  | 0.014     | 0.013 | 2.88E-01 |
| <b>Meta</b> | Baseline     | Tau  | Plasma | e33 | 3951 | 3951 | Reference |       |          |

ARIC is the Atherosclerosis Risk in Communities Study. FHS\_C1, FHS\_C2, and FHS\_C3 denote the Framingham Heart Study parental, offspring, and grandchildren cohorts, respectively. ADNI-1 and ADNI-2/GO denote the Alzheimer's disease Neuroimaging Initiative initial and extended cohorts, respectively. Meta shows the results of meta-analysis. Meta-analysis field was shown for consistency for each biomarker even if the analysis was performed in one study only. Column "Type" indicates biomarker measurements at baseline or longitudinally. Abbreviations: CSF: cerebrospinal fluid; SE: standard error. The APOE ε2 allele was defined as e22 and e23 genotypes. A gamma general linear model with a log link function was used for all biomarkers except Aβ40 and Aβ42 measured in plasma.

**Supplementary Table 5. Associations of compound genotypes with Alzheimer’s disease (AD) A $\beta$ 42 and tau biomarkers measured at baseline.**

| Study       | Biomarker    | Source | Genotype | N    | Beta      | SE    | P value  |
|-------------|--------------|--------|----------|------|-----------|-------|----------|
| ADNI-1      | A $\beta$ 42 | CSF    | 0XY      | 30   | -0.029    | 0.079 | 7.14E-01 |
| ADNI-1      | A $\beta$ 42 | CSF    | 100+200  | 31   | -0.347    | 0.084 | 6.82E-05 |
| ADNI-1      | A $\beta$ 42 | CSF    | 111+222  | 101  | -0.411    | 0.055 | 1.64E-12 |
| ADNI-1      | A $\beta$ 42 | CSF    | 1XY+2XY  | 138  | -0.450    | 0.050 | 1.08E-16 |
| ADNI-1      | A $\beta$ 42 | CSF    | 000      | 112  | Reference |       |          |
| ADNI-2/GO   | A $\beta$ 42 | CSF    | 0XY      | 29   | 0.078     | 0.077 | 3.13E-01 |
| ADNI-2/GO   | A $\beta$ 42 | CSF    | 100+200  | 25   | -0.208    | 0.078 | 8.82E-03 |
| ADNI-2/GO   | A $\beta$ 42 | CSF    | 111+222  | 77   | -0.268    | 0.056 | 3.06E-06 |
| ADNI-2/GO   | A $\beta$ 42 | CSF    | 1XY+2XY  | 104  | -0.288    | 0.053 | 1.77E-07 |
| ADNI-2/GO   | A $\beta$ 42 | CSF    | 000      | 125  | Reference |       |          |
| <i>Meta</i> | A $\beta$ 42 | CSF    | 0XY      | 59   | 0.026     | 0.055 | 6.37E-01 |
| <i>Meta</i> | A $\beta$ 42 | CSF    | 100+200  | 56   | -0.272    | 0.057 | 2.13E-06 |
| <i>Meta</i> | A $\beta$ 42 | CSF    | 111+222  | 178  | -0.341    | 0.039 | 2.46E-18 |
| <i>Meta</i> | A $\beta$ 42 | CSF    | 1XY+2XY  | 242  | -0.373    | 0.037 | 2.18E-24 |
| <i>Meta</i> | A $\beta$ 42 | CSF    | 000      | 237  | Reference |       |          |
| ADNI-1      | A $\beta$ 42 | Plasma | 0XY      | 48   | -2.137    | 1.752 | 2.23E-01 |
| ADNI-1      | A $\beta$ 42 | Plasma | 100+200  | 51   | -1.342    | 1.769 | 4.49E-01 |
| ADNI-1      | A $\beta$ 42 | Plasma | 111+222  | 197  | -2.598    | 1.067 | 1.53E-02 |
| ADNI-1      | A $\beta$ 42 | Plasma | 1XY+2XY  | 252  | -2.418    | 1.012 | 1.73E-02 |
| ADNI-1      | A $\beta$ 42 | Plasma | 000      | 261  | Reference |       |          |
| FHS_C1      | A $\beta$ 42 | Plasma | 0XY      | 60   | -2.829    | 1.588 | 7.54E-02 |
| FHS_C1      | A $\beta$ 42 | Plasma | 100+200  | 22   | -4.084    | 2.621 | 1.20E-01 |
| FHS_C1      | A $\beta$ 42 | Plasma | 111+222  | 50   | -4.227    | 1.776 | 1.78E-02 |
| FHS_C1      | A $\beta$ 42 | Plasma | 1XY+2XY  | 77   | -3.850    | 1.442 | 7.86E-03 |
| FHS_C1      | A $\beta$ 42 | Plasma | 000      | 344  | Reference |       |          |
| FHS_C2      | A $\beta$ 42 | Plasma | 0XY      | 354  | -0.582    | 0.585 | 3.20E-01 |
| FHS_C2      | A $\beta$ 42 | Plasma | 100+200  | 133  | -2.231    | 0.931 | 1.66E-02 |
| FHS_C2      | A $\beta$ 42 | Plasma | 111+222  | 397  | -1.670    | 0.573 | 3.59E-03 |
| FHS_C2      | A $\beta$ 42 | Plasma | 1XY+2XY  | 504  | -2.093    | 0.516 | 5.12E-05 |
| FHS_C2      | A $\beta$ 42 | Plasma | 000      | 1843 | Reference |       |          |
| FHS_C3      | A $\beta$ 42 | Plasma | 0XY      | 292  | 1.460     | 0.626 | 1.98E-02 |
| FHS_C3      | A $\beta$ 42 | Plasma | 100+200  | 128  | -1.586    | 0.908 | 8.07E-02 |
| FHS_C3      | A $\beta$ 42 | Plasma | 111+222  | 512  | -0.848    | 0.494 | 8.63E-02 |
| FHS_C3      | A $\beta$ 42 | Plasma | 1XY+2XY  | 615  | -0.618    | 0.462 | 1.81E-01 |
| FHS_C3      | A $\beta$ 42 | Plasma | 000      | 1994 | Reference |       |          |
| ARIC        | A $\beta$ 42 | Plasma | 0XY      | 197  | 1.809     | 0.860 | 3.56E-02 |
| ARIC        | A $\beta$ 42 | Plasma | 100+200  | 62   | -4.463    | 1.463 | 2.34E-03 |
| ARIC        | A $\beta$ 42 | Plasma | 111+222  | 306  | -2.109    | 0.724 | 3.65E-03 |
| ARIC        | A $\beta$ 42 | Plasma | 1XY+2XY  | 373  | -2.304    | 0.671 | 6.15E-04 |
| ARIC        | A $\beta$ 42 | Plasma | 000      | 1107 | Reference |       |          |
| <i>Meta</i> | A $\beta$ 42 | Plasma | 0XY      | 951  | 0.351     | 0.364 | 3.35E-01 |
| <i>Meta</i> | A $\beta$ 42 | Plasma | 100+200  | 396  | -2.305    | 0.551 | 2.82E-05 |
| <i>Meta</i> | A $\beta$ 42 | Plasma | 111+222  | 1462 | -1.582    | 0.312 | 4.14E-07 |
| <i>Meta</i> | A $\beta$ 42 | Plasma | 1XY+2XY  | 1821 | -1.656    | 0.287 | 7.98E-09 |
| <i>Meta</i> | A $\beta$ 42 | Plasma | 000      | 5549 | Reference |       |          |
| ADNI-1      | Tau          | CSF    | 0XY      | 31   | 0.158     | 0.075 | 3.61E-02 |
| ADNI-1      | Tau          | CSF    | 100+200  | 30   | 0.234     | 0.080 | 3.99E-03 |
| ADNI-1      | Tau          | CSF    | 111+222  | 105  | 0.247     | 0.049 | 8.28E-07 |
| ADNI-1      | Tau          | CSF    | 1XY+2XY  | 142  | 0.244     | 0.043 | 4.96E-08 |
| ADNI-1      | Tau          | CSF    | 000      | 142  | Reference |       |          |
| ADNI-2/GO   | Tau          | CSF    | 0XY      | 39   | 0.031     | 0.068 | 6.46E-01 |
| ADNI-2/GO   | Tau          | CSF    | 100+200  | 26   | 0.232     | 0.077 | 3.05E-03 |
| ADNI-2/GO   | Tau          | CSF    | 111+222  | 84   | 0.342     | 0.050 | 5.86E-11 |

|             |     |        |         |      |           |       |          |
|-------------|-----|--------|---------|------|-----------|-------|----------|
| ADNI-2/GO   | Tau | CSF    | 1XY+2XY | 111  | 0.355     | 0.048 | 1.38E-12 |
| ADNI-2/GO   | Tau | CSF    | 000     | 184  | Reference |       |          |
| <i>Meta</i> | Tau | CSF    | 0XY     | 70   | 0.088     | 0.050 | 7.97E-02 |
| <i>Meta</i> | Tau | CSF    | 100+200 | 56   | 0.233     | 0.056 | 2.85E-05 |
| <i>Meta</i> | Tau | CSF    | 111+222 | 189  | 0.293     | 0.035 | 4.87E-17 |
| <i>Meta</i> | Tau | CSF    | 1XY+2XY | 253  | 0.294     | 0.032 | 6.75E-20 |
| <i>Meta</i> | Tau | CSF    | 000     | 326  | Reference |       |          |
| ADNI-1      | Tau | Plasma | 0XY     | 39   | -0.059    | 0.099 | 5.49E-01 |
| ADNI-1      | Tau | Plasma | 100+200 | 38   | 0.048     | 0.102 | 6.37E-01 |
| ADNI-1      | Tau | Plasma | 111+222 | 156  | 0.085     | 0.059 | 1.53E-01 |
| ADNI-1      | Tau | Plasma | 1XY+2XY | 204  | 0.117     | 0.059 | 4.83E-02 |
| ADNI-1      | Tau | Plasma | 000     | 216  | Reference |       |          |
| FHS_C1      | Tau | Plasma | 0XY     | 17   | -0.024    | 0.092 | 7.93E-01 |
| FHS_C1      | Tau | Plasma | 100+200 | 5    | -0.040    | 0.052 | 4.43E-01 |
| FHS_C1      | Tau | Plasma | 111+222 | 9    | -0.099    | 0.133 | 4.58E-01 |
| FHS_C1      | Tau | Plasma | 1XY+2XY | 14   | -0.172    | 0.103 | 9.89E-02 |
| FHS_C1      | Tau | Plasma | 000     | 91   | Reference |       |          |
| FHS_C2      | Tau | Plasma | 0XY     | 300  | 0.030     | 0.020 | 1.27E-01 |
| FHS_C2      | Tau | Plasma | 100+200 | 118  | -0.054    | 0.030 | 7.47E-02 |
| FHS_C2      | Tau | Plasma | 111+222 | 357  | -0.022    | 0.019 | 2.34E-01 |
| FHS_C2      | Tau | Plasma | 1XY+2XY | 448  | -0.008    | 0.017 | 6.55E-01 |
| FHS_C2      | Tau | Plasma | 000     | 1615 | Reference |       |          |
| FHS_C3      | Tau | Plasma | 0XY     | 291  | -0.005    | 0.018 | 7.86E-01 |
| FHS_C3      | Tau | Plasma | 100+200 | 128  | -0.047    | 0.026 | 7.72E-02 |
| FHS_C3      | Tau | Plasma | 111+222 | 511  | -0.007    | 0.015 | 6.07E-01 |
| FHS_C3      | Tau | Plasma | 1XY+2XY | 614  | -0.002    | 0.013 | 8.88E-01 |
| FHS_C3      | Tau | Plasma | 000     | 1991 | Reference |       |          |
| <i>Meta</i> | Tau | Plasma | 0XY     | 647  | 0.009     | 0.013 | 4.91E-01 |
| <i>Meta</i> | Tau | Plasma | 100+200 | 289  | -0.045    | 0.018 | 1.28E-02 |
| <i>Meta</i> | Tau | Plasma | 111+222 | 1033 | -0.010    | 0.011 | 3.66E-01 |
| <i>Meta</i> | Tau | Plasma | 1XY+2XY | 1280 | -0.002    | 0.010 | 8.42E-01 |
| <i>Meta</i> | Tau | Plasma | 000     | 3913 | Reference |       |          |

ARIC is the Atherosclerosis Risk in Communities Study. FHS\_C1, FHS\_C2, and FHS\_C3 denote the Framingham Heart Study parental, offspring, and grandchildren cohorts, respectively. ADNI-1 and ADNI-2/GO denote the Alzheimer's disease Neuroimaging Initiative initial and extended cohorts, respectively. Meta shows the results of meta-analysis. Meta-analysis field was shown for consistency for each biomarker even if the analysis was performed in one study only. Column "Genotype" shows compound genotypes encoded by triples of numbers and X and Y letters. Numbers show the counts of minor alleles (i.e., 0, 1, 2) in rs429358\_T/c, rs2075650\_A/g or rs12721046\_G/a SNP, in that order. The upper/lower case denotes here major/minor allele. The most frequent 000 genotype denotes the major allele homozygote for all three SNPs, i.e., rs429358\_TT, rs2075650\_AA, rs12721046\_GG. The 100+200 genotype indicates rs429358\_Tc, rs2075650\_AA, rs12721046\_GG (100) and rs429358\_cc, rs2075650\_AA, rs12721046\_GG (200). The 111+222 genotype denotes rs429358\_Tc, rs2075650\_Ag, rs12721046\_Ga (111) and rs429358\_cc, rs2075650\_gg, rs12721046\_aa (222). Letters X and Y indicate aggregation of minor alleles of rs2075650 and rs12721046, respectively. Genotype 0XY aggregates all non-e4 genotypes except 000. The 1XY+2XY genotype aggregates rs429358\_Tc (1) and rs429358\_cc (2) and all genotypes of rs2075650 (X) and rs12721046 (Y), except major allele homozygote of both SNPs, rs2075650\_AA and rs12721046\_GG (00), because it is included in the 100+200 genotype. Column "SE" shows standard error. A gamma general linear model with a log link function was used for all biomarkers except Aβ42 measured in plasma.

**Supplementary Table 6. Comparative analysis of the associations of the selected compound genotypes with Alzheimer's disease (AD) A $\beta$ 42 and tau biomarkers.**

| Study       | Biomarker    | Source | Genotype | N    | Beta      | SE    | P value  |
|-------------|--------------|--------|----------|------|-----------|-------|----------|
| ADNI-1      | A $\beta$ 42 | CSF    | 111+222  | 101  | -0.047    | 0.081 | 5.62E-01 |
| ADNI-1      | A $\beta$ 42 | CSF    | 1XY+2XY  | 138  | -0.087    | 0.077 | 2.64E-01 |
| ADNI-1      | A $\beta$ 42 | CSF    | 100+200  | 31   | Reference |       |          |
| ADNI-2/GO   | A $\beta$ 42 | CSF    | 111+222  | 77   | -0.065    | 0.095 | 4.99E-01 |
| ADNI-2/GO   | A $\beta$ 42 | CSF    | 1XY+2XY  | 104  | -0.097    | 0.096 | 3.14E-01 |
| ADNI-2/GO   | A $\beta$ 42 | CSF    | 100+200  | 25   | Reference |       |          |
| <i>Meta</i> | A $\beta$ 42 | CSF    | 111+222  | 178  | -0.054    | 0.062 | 3.77E-01 |
| <i>Meta</i> | A $\beta$ 42 | CSF    | 1XY+2XY  | 242  | -0.091    | 0.060 | 1.32E-01 |
| <i>Meta</i> | A $\beta$ 42 | CSF    | 100+200  | 56   | Reference |       |          |
| ADNI-1      | A $\beta$ 42 | Plasma | 111+222  | 197  | -1.200    | 1.626 | 4.61E-01 |
| ADNI-1      | A $\beta$ 42 | Plasma | 1XY+2XY  | 252  | -1.189    | 1.647 | 4.71E-01 |
| ADNI-1      | A $\beta$ 42 | Plasma | 100+200  | 51   | Reference |       |          |
| FHS_C1      | A $\beta$ 42 | Plasma | 111+222  | 50   | 0.011     | 2.532 | 9.96E-01 |
| FHS_C1      | A $\beta$ 42 | Plasma | 1XY+2XY  | 77   | 0.004     | 2.163 | 9.98E-01 |
| FHS_C1      | A $\beta$ 42 | Plasma | 100+200  | 22   | Reference |       |          |
| FHS_C2      | A $\beta$ 42 | Plasma | 111+222  | 397  | 0.442     | 0.962 | 6.46E-01 |
| FHS_C2      | A $\beta$ 42 | Plasma | 1XY+2XY  | 504  | 0.051     | 0.914 | 9.56E-01 |
| FHS_C2      | A $\beta$ 42 | Plasma | 100+200  | 133  | Reference |       |          |
| FHS_C3      | A $\beta$ 42 | Plasma | 111+222  | 512  | 0.706     | 0.997 | 4.79E-01 |
| FHS_C3      | A $\beta$ 42 | Plasma | 1XY+2XY  | 615  | 0.939     | 0.992 | 3.44E-01 |
| FHS_C3      | A $\beta$ 42 | Plasma | 100+200  | 128  | Reference |       |          |
| ARIC        | A $\beta$ 42 | Plasma | 111+222  | 306  | 2.508     | 1.460 | 8.66E-02 |
| ARIC        | A $\beta$ 42 | Plasma | 1XY+2XY  | 373  | 2.302     | 1.455 | 1.14E-01 |
| ARIC        | A $\beta$ 42 | Plasma | 100+200  | 62   | Reference |       |          |
| <i>Meta</i> | A $\beta$ 42 | Plasma | 111+222  | 1462 | 0.619     | 0.569 | 2.77E-01 |
| <i>Meta</i> | A $\beta$ 42 | Plasma | 1XY+2XY  | 1821 | 0.509     | 0.553 | 3.57E-01 |
| <i>Meta</i> | A $\beta$ 42 | Plasma | 100+200  | 396  | Reference |       |          |
| ADNI-1      | Tau          | CSF    | 111+222  | 105  | 0.041     | 0.072 | 5.70E-01 |
| ADNI-1      | Tau          | CSF    | 1XY+2XY  | 142  | 0.030     | 0.066 | 6.50E-01 |
| ADNI-1      | Tau          | CSF    | 100+200  | 30   | Reference |       |          |
| ADNI-2/GO   | Tau          | CSF    | 111+222  | 84   | 0.107     | 0.092 | 2.50E-01 |
| ADNI-2/GO   | Tau          | CSF    | 1XY+2XY  | 111  | 0.121     | 0.095 | 2.04E-01 |
| ADNI-2/GO   | Tau          | CSF    | 100+200  | 26   | Reference |       |          |
| <i>Meta</i> | Tau          | CSF    | 111+222  | 189  | 0.066     | 0.057 | 2.46E-01 |
| <i>Meta</i> | Tau          | CSF    | 1XY+2XY  | 253  | 0.060     | 0.054 | 2.70E-01 |
| <i>Meta</i> | Tau          | CSF    | 100+200  | 56   | Reference |       |          |
| ADNI-1      | Tau          | Plasma | 111+222  | 156  | 0.030     | 0.085 | 7.26E-01 |
| ADNI-1      | Tau          | Plasma | 1XY+2XY  | 204  | 0.063     | 0.098 | 5.18E-01 |
| ADNI-1      | Tau          | Plasma | 100+200  | 38   | Reference |       |          |
| FHS_C1      | Tau          | Plasma | 111+222  | 9    | 0.075     | 0.288 | 8.02E-01 |
| FHS_C1      | Tau          | Plasma | 1XY+2XY  | 14   | 0.000     | 0.342 | 1.00E+00 |
| FHS_C1      | Tau          | Plasma | 100+200  | 5    | Reference |       |          |

|             |     |        |         |      |           |       |          |
|-------------|-----|--------|---------|------|-----------|-------|----------|
| FHS_C2      | Tau | Plasma | 111+222 | 357  | 0.027     | 0.035 | 4.33E-01 |
| FHS_C2      | Tau | Plasma | 1XY+2XY | 448  | 0.053     | 0.032 | 1.01E-01 |
| FHS_C2      | Tau | Plasma | 100+200 | 118  | Reference |       |          |
| FHS_C3      | Tau | Plasma | 111+222 | 511  | 0.037     | 0.029 | 2.03E-01 |
| FHS_C3      | Tau | Plasma | 1XY+2XY | 614  | 0.041     | 0.028 | 1.39E-01 |
| FHS_C3      | Tau | Plasma | 100+200 | 128  | Reference |       |          |
| <i>Meta</i> | Tau | Plasma | 111+222 | 1033 | 0.033     | 0.021 | 1.25E-01 |
| <i>Meta</i> | Tau | Plasma | 1XY+2XY | 1280 | 0.047     | 0.021 | 2.27E-02 |
| <i>Meta</i> | Tau | Plasma | 100+200 | 289  | Reference |       |          |

ARIC is the Atherosclerosis Risk in Communities Study. FHS\_C1, FHS\_C2, and FHS\_C3 denote the Framingham Heart Study parental, offspring, and grandchildren cohorts, respectively. ADNI-1 and ADNI-2/GO denote the Alzheimer's disease Neuroimaging Initiative initial and extended cohorts, respectively. Meta shows the results of meta-analysis. Meta-analysis field was shown for consistency for each biomarker even if the analysis was performed in one study only. Column "Genotype" shows compound genotypes encoded by triples of numbers and X and Y letters. Numbers show the counts of minor alleles (i.e., 0, 1, 2) in rs429358\_T/c, rs2075650\_A/g or rs12721046\_G/a SNP, in that order. The upper/lower case denotes here major/minor allele. The most frequent 000 genotype denotes the major allele homozygote for all three SNPs, i.e., rs429358\_TT, rs2075650\_AA, rs12721046\_GG. The 100+200 genotype indicates rs429358\_Tc, rs2075650\_AA, rs12721046\_GG (100) and rs429358\_cc, rs2075650\_AA, rs12721046\_GG (200). The 111+222 genotype denotes rs429358\_Tc, rs2075650\_Ag, rs12721046\_Ga (111) and rs429358\_cc, rs2075650\_gg, rs12721046\_aa (222). Letters X and Y indicate aggregation of minor alleles of rs2075650 and rs12721046, respectively. The 1XY+2XY genotype aggregates rs429358\_Tc (1) and rs429358\_cc (2) and all genotypes of rs2075650 (X) and rs12721046 (Y), except major allele homozygote of both SNPs, rs2075650\_AA and rs12721046\_GG (00), because it is included in the 100+200 genotype. Column "SE" shows standard error. A gamma general linear model with a log link function was used for all biomarkers except A $\beta$ 42 measured in plasma.

**Supplementary Table 7. Comparative analysis of the associations of the selected compound genotypes with Alzheimer's disease (AD) A $\beta$ 42 and tau biomarkers with carriers of the  $\epsilon$ 2 allele excluded.**

| Study       | Biomarker    | Source | Genotype | N   | Beta      | SE    | P value  |
|-------------|--------------|--------|----------|-----|-----------|-------|----------|
| ADNI-1      | A $\beta$ 42 | CSF    | 111+222  | 97  | -0.060    | 0.082 | 4.67E-01 |
| ADNI-1      | A $\beta$ 42 | CSF    | 1XY+2XY  | 134 | -0.099    | 0.078 | 2.06E-01 |
| ADNI-1      | A $\beta$ 42 | CSF    | 100+200  | 31  | Reference |       |          |
| ADNI-2/GO   | A $\beta$ 42 | CSF    | 111+222  | 75  | -0.054    | 0.094 | 5.67E-01 |
| ADNI-2/GO   | A $\beta$ 42 | CSF    | 1XY+2XY  | 102 | -0.091    | 0.096 | 3.46E-01 |
| ADNI-2/GO   | A $\beta$ 42 | CSF    | 100+200  | 25  | Reference |       |          |
| <i>Meta</i> | A $\beta$ 42 | CSF    | 111+222  | 172 | -0.057    | 0.062 | 3.54E-01 |
| <i>Meta</i> | A $\beta$ 42 | CSF    | 1XY+2XY  | 236 | -0.096    | 0.061 | 1.14E-01 |
| <i>Meta</i> | A $\beta$ 42 | CSF    | 100+200  | 56  | Reference |       |          |
| ADNI-1      | A $\beta$ 42 | Plasma | 111+222  | 187 | -1.291    | 1.661 | 4.38E-01 |
| ADNI-1      | A $\beta$ 42 | Plasma | 1XY+2XY  | 241 | -1.261    | 1.685 | 4.55E-01 |
| ADNI-1      | A $\beta$ 42 | Plasma | 100+200  | 50  | Reference |       |          |
| FHS_C1      | A $\beta$ 42 | Plasma | 111+222  | 43  | 0.658     | 2.716 | 8.09E-01 |
| FHS_C1      | A $\beta$ 42 | Plasma | 1XY+2XY  | 70  | 0.840     | 2.261 | 7.11E-01 |
| FHS_C1      | A $\beta$ 42 | Plasma | 100+200  | 21  | Reference |       |          |
| FHS_C2      | A $\beta$ 42 | Plasma | 111+222  | 362 | 0.334     | 1.035 | 7.47E-01 |
| FHS_C2      | A $\beta$ 42 | Plasma | 1XY+2XY  | 465 | -0.067    | 0.981 | 9.46E-01 |
| FHS_C2      | A $\beta$ 42 | Plasma | 100+200  | 116 | Reference |       |          |
| FHS_C3      | A $\beta$ 42 | Plasma | 111+222  | 460 | 0.870     | 1.068 | 4.16E-01 |
| FHS_C3      | A $\beta$ 42 | Plasma | 1XY+2XY  | 561 | 1.088     | 1.063 | 3.06E-01 |
| FHS_C3      | A $\beta$ 42 | Plasma | 100+200  | 113 | Reference |       |          |
| ARIC        | A $\beta$ 42 | Plasma | 111+222  | 273 | 2.587     | 1.474 | 8.02E-02 |
| ARIC        | A $\beta$ 42 | Plasma | 1XY+2XY  | 338 | 2.458     | 1.476 | 9.66E-02 |

|             |              |        |         |      |           |       |          |
|-------------|--------------|--------|---------|------|-----------|-------|----------|
| ARIC        | A $\beta$ 42 | Plasma | 100+200 | 59   | Reference |       |          |
| <b>Meta</b> | A $\beta$ 42 | Plasma | 111+222 | 1325 | 0.682     | 0.601 | 2.57E-01 |
| <b>Meta</b> | A $\beta$ 42 | Plasma | 1XY+2XY | 1675 | 0.594     | 0.584 | 3.09E-01 |
| <b>Meta</b> | A $\beta$ 42 | Plasma | 100+200 | 359  | Reference |       |          |
| ADNI-1      | Tau          | CSF    | 111+222 | 100  | 0.036     | 0.071 | 6.16E-01 |
| ADNI-1      | Tau          | CSF    | 1XY+2XY | 137  | 0.023     | 0.065 | 7.22E-01 |
| ADNI-1      | Tau          | CSF    | 100+200 | 30   | Reference |       |          |
| ADNI-2/GO   | Tau          | CSF    | 111+222 | 82   | 0.116     | 0.092 | 2.11E-01 |
| ADNI-2/GO   | Tau          | CSF    | 1XY+2XY | 109  | 0.128     | 0.094 | 1.79E-01 |
| ADNI-2/GO   | Tau          | CSF    | 100+200 | 26   | Reference |       |          |
| <b>Meta</b> | Tau          | CSF    | 111+222 | 182  | 0.066     | 0.056 | 2.43E-01 |
| <b>Meta</b> | Tau          | CSF    | 1XY+2XY | 246  | 0.057     | 0.054 | 2.89E-01 |
| <b>Meta</b> | Tau          | CSF    | 100+200 | 56   | Reference |       |          |
| ADNI-1      | Tau          | Plasma | 111+222 | 150  | 0.033     | 0.085 | 6.99E-01 |
| ADNI-1      | Tau          | Plasma | 1XY+2XY | 197  | 0.067     | 0.099 | 4.97E-01 |
| ADNI-1      | Tau          | Plasma | 100+200 | 38   | Reference |       |          |
| FHS_C1      | Tau          | Plasma | 111+222 | 8    | 0.079     | 0.299 | 7.98E-01 |
| FHS_C1      | Tau          | Plasma | 1XY+2XY | 13   | 0.001     | 0.259 | 9.97E-01 |
| FHS_C1      | Tau          | Plasma | 100+200 | 5    | Reference |       |          |
| FHS_C2      | Tau          | Plasma | 111+222 | 329  | 0.022     | 0.037 | 5.49E-01 |
| FHS_C2      | Tau          | Plasma | 1XY+2XY | 417  | 0.050     | 0.034 | 1.46E-01 |
| FHS_C2      | Tau          | Plasma | 100+200 | 104  | Reference |       |          |
| FHS_C3      | Tau          | Plasma | 111+222 | 459  | 0.031     | 0.029 | 2.93E-01 |
| FHS_C3      | Tau          | Plasma | 1XY+2XY | 560  | 0.038     | 0.028 | 1.84E-01 |
| FHS_C3      | Tau          | Plasma | 100+200 | 113  | Reference |       |          |
| <b>Meta</b> | Tau          | Plasma | 111+222 | 946  | 0.028     | 0.022 | 2.03E-01 |
| <b>Meta</b> | Tau          | Plasma | 1XY+2XY | 1187 | 0.044     | 0.021 | 4.06E-02 |
| <b>Meta</b> | Tau          | Plasma | 100+200 | 260  | Reference |       |          |

ARIC is the Atherosclerosis Risk in Communities Study. FHS\_C1, FHS\_C2, and FHS\_C3 denote the Framingham Heart Study parental, offspring, and grandchildren cohorts, respectively. ADNI-1 and ADNI-2/GO denote the Alzheimer's disease Neuroimaging Initiative initial and extended cohorts, respectively. Meta shows the results of meta-analysis. Meta-analysis field was shown for consistency for each biomarker even if the analysis was performed in one study only. Column "Genotype" shows compound genotypes encoded by triples of numbers and X and Y letters. Numbers show the counts of minor alleles (i.e., 0, 1, 2) in rs429358\_T/c, rs2075650\_A/g or rs12721046\_G/a SNP, in that order. The upper/lower case denotes here major/minor allele. The most frequent 000 genotype denotes the major allele homozygote for all three SNPs, i.e., rs429358\_TT, rs2075650\_AA, rs12721046\_GG. The 100+200 genotype indicates rs429358\_Tc, rs2075650\_AA, rs12721046\_GG (100) and rs429358\_cc, rs2075650\_AA, rs12721046\_GG (200). The 111+222 genotype denotes rs429358\_Tc, rs2075650\_Ag, rs12721046\_Ga (111) and rs429358\_cc, rs2075650\_gg, rs12721046\_aa (222). Letters X and Y indicate aggregation of minor alleles of rs2075650 and rs12721046, respectively. The 1XY+2XY genotype aggregates rs429358\_Tc (1) and rs429358\_cc (2) and all genotypes of rs2075650 (X) and rs12721046 (Y), except major allele homozygote of both SNPs, rs2075650\_AA and rs12721046\_GG (00), because it is included in the 100+200 genotype. Column "SE" shows standard error. A gamma general linear model with a log link function was used for all biomarkers except A $\beta$ 42 measured in plasma.
